# Supplementary material
Source: PubMed Central journal article supplement (PMC8492916)
Supplement: mmc1.pdf [file mmc1.pdf]

**Cell Reports, Volume 37**

**Supplemental information**

**A potent bispecific nanobody  
protects hACE2 mice against SARS-CoV-2  
infection via intranasal administration**

**Xilin Wu, Lin Cheng, Ming Fu, Bilian Huang, Linjing Zhu, Shijie Xu, Haixia Shi, Doudou Zhang, Huanyun Yuan, Waqas Nawaz, Ping Yang, Qinxue Hu, Yalan Liu, and Zhiwei Wu**

- 1 **This file includes:**  
 2 Supplemental Figures 1 to 7  
 3 Supplemental Table 1 to 3  
 4

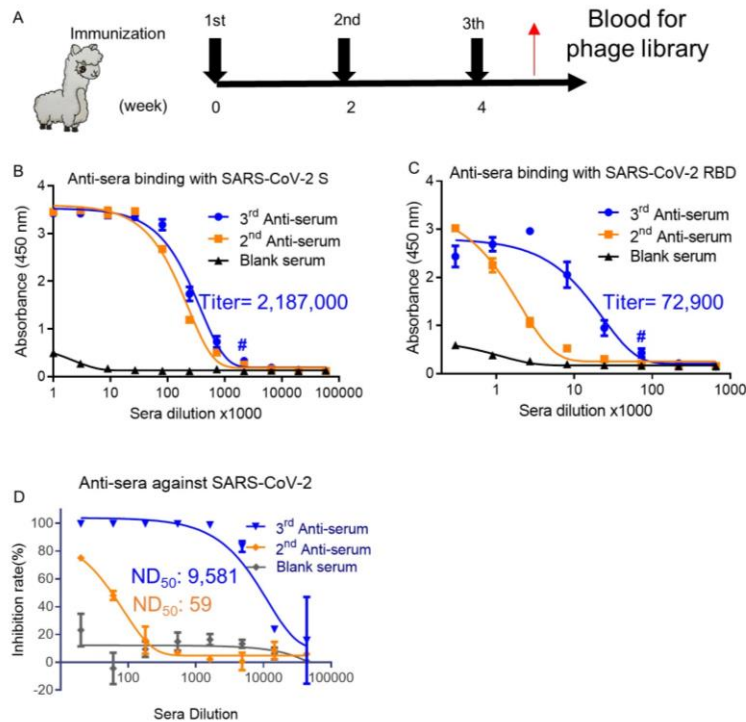

- 5  
 6 **Supplemental Figure 1. Characterization of anti-sera specific for SARS-CoV-2. Related to Figure**  
 7 **1. (A)** The experimental schedule for immunization. The titer of anti-sera specific for SARS-CoV-2 S  
 8 protein **(B)** and RBD protein **(C)** was evaluated one week after the immunization in alpaca receiving  
 9 SARS-CoV-2 spike protein, respectively. The titer of the third anti-serum was indicated as blue line.  
 10 The blue # indicates the anti-serum titer after the third immunization. 3<sup>rd</sup> anti-serum and 2<sup>nd</sup> anti-serum  
 11 represent the anti-sera collected from alpaca one week after the 3<sup>rd</sup> and 2<sup>nd</sup> immunization. Blank serum  
 12 represents the alpaca serum collected before immunization, which was taken as a negative control. **(D)**  
 13 Neutralization potency of the immunized alpaca's serum against pseudotyped SARS-CoV-2 was  
 14 detected. ND<sub>50</sub>: half-maximal serum neutralization dilution titer. Titer and ND<sub>50</sub> were indicated. Data of  
 15 B-D represent as mean ± SEM. All experiments of B-D were repeated twice.  
 16  
 17

A

The summary of C9-Nb library

| Name      | Library size      | Sequencing clone | Sequence results | In frame clone | Diversity  | In frame rate |
|-----------|-------------------|------------------|------------------|----------------|------------|---------------|
| C9-Nb-lib | $2.0 \times 10^9$ | 25               | 25               | 24             | 24/24 100% | 24/25 96%     |

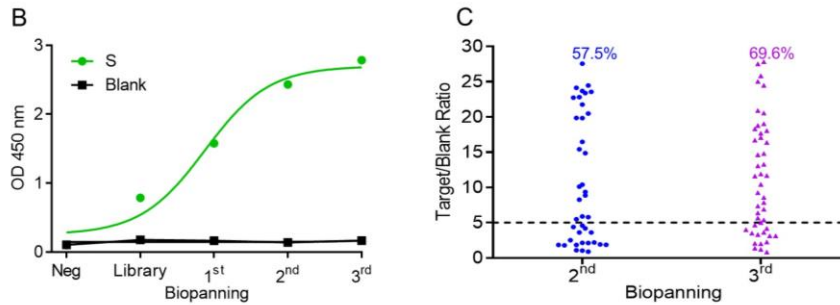

18

19 **Supplemental Figure 2. The construction and biopanning of C9-Nb library. Related to Figure 1.**

20 (A) The table summary of C9-Nb library, wherein phage displayed Nb of PBMC from alpaca receiving  
21 three times immunization of SARS-CoV-2 S protein. (B) The binding of the phage library with S via  
22 phage ELISA. Lib is the phage library of C9-Nb; 1<sup>st</sup>, 2<sup>nd</sup>, and 3<sup>rd</sup> are the phage library after panning on  
23 1 round, 2 rounds, and 3 rounds of S protein enrichment, respectively. (C) Single clone of phages from  
24 the C9-Nb library after the second and third enrichment of SARS-CoV-2 S were analyzed by phage  
25 ELISA. One dot represents the supernatant binding of one clone. Positive rate was indicated.

26

27

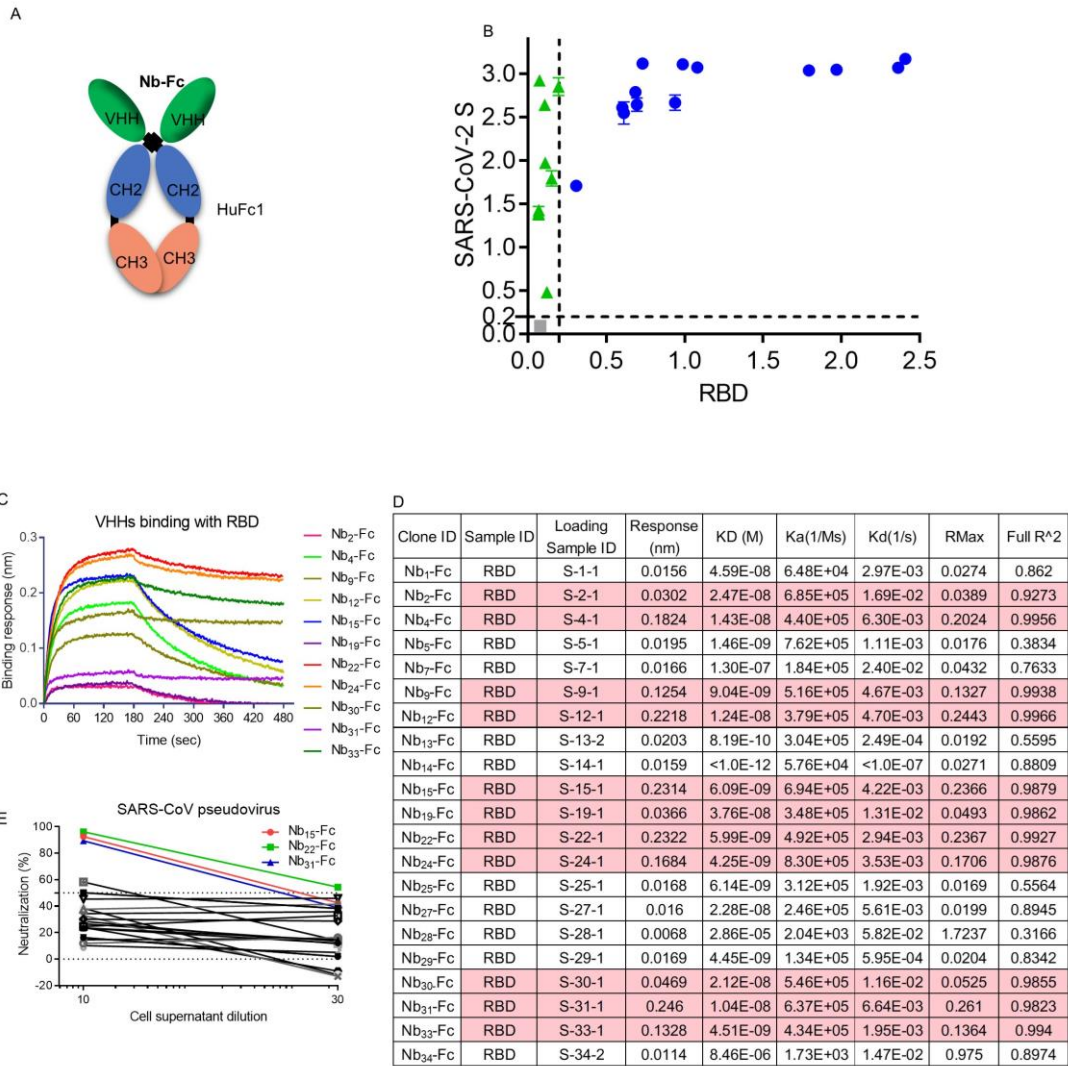

28

29 **Supplemental Figure 3. Characterization of Nb-Fc. Related to Figure 1.** (A) The diagram of Nb-Fc,

30 constituted by Nb fusing with human Fc1. (B) 21 various Nb-Fcs binding with S and RBD protein

31 identified by ELISA. Grey dot represents negative control. Green dots represent the specific binding

32 with S protein. Blue dots represent the double binding with S and RBD protein. (C) Representative

33 binding curve of Nb-Fcs with RBD tested by BLI. (D) The table summary of 21 Nb-Fcs binding with

34 RBD tested by BLI. (E) The cell supernatants of 21 various Nb-Fcs were tested for neutralization

35 against SARS-CoV-2 infection, the cell supernatant displaying outstanding neutralizing curve was

36 labeled as the color-coded curve. Data of B represent as mean  $\pm$  SEM. All experiments of B-E were

37 repeated twice

38

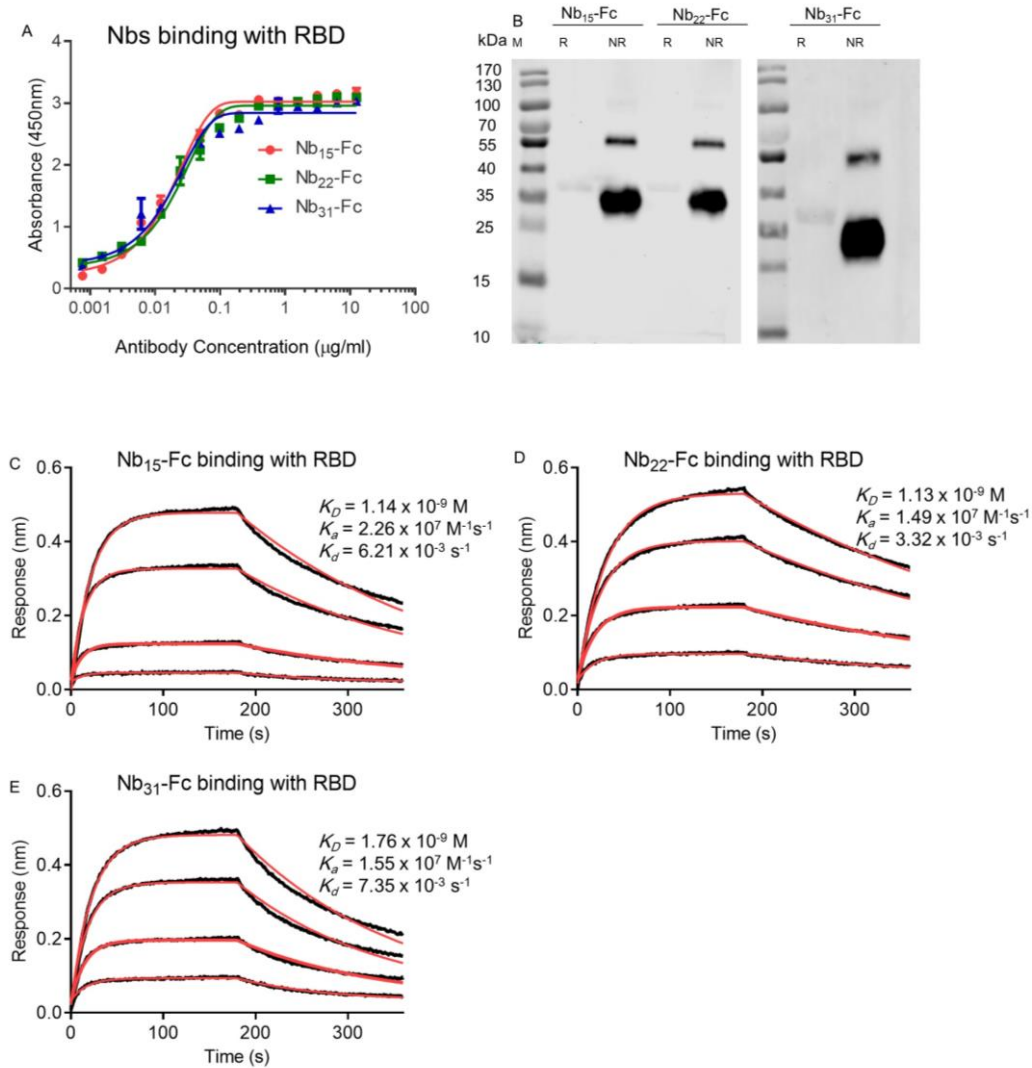

39

40 **Supplemental Figure 4. Characterization of purified Nb-Fcs. Related to Figure 1.** (A) Purified Nb-  
 41 Fcs binding with RBD identified by ELISA. Data represent as mean  $\pm$  SEM. (B) RBD protein under  
 42 reducing condition (R) or non-reducing condition (NR) was detected by WB with Nb<sub>15</sub>-Fc, Nb<sub>22</sub>-Fc and  
 43 Nb<sub>31</sub>-Fc. Kinetic binding curve of RBD with Nb<sub>15</sub>-Fc (C), Nb<sub>22</sub>-Fc (D) and Nb<sub>31</sub>-Fc (E), respectively.  
 44 Binding curves are colored black, and fit of the data to a 1:1 binding model is colored red.

45

46

Fig. S5

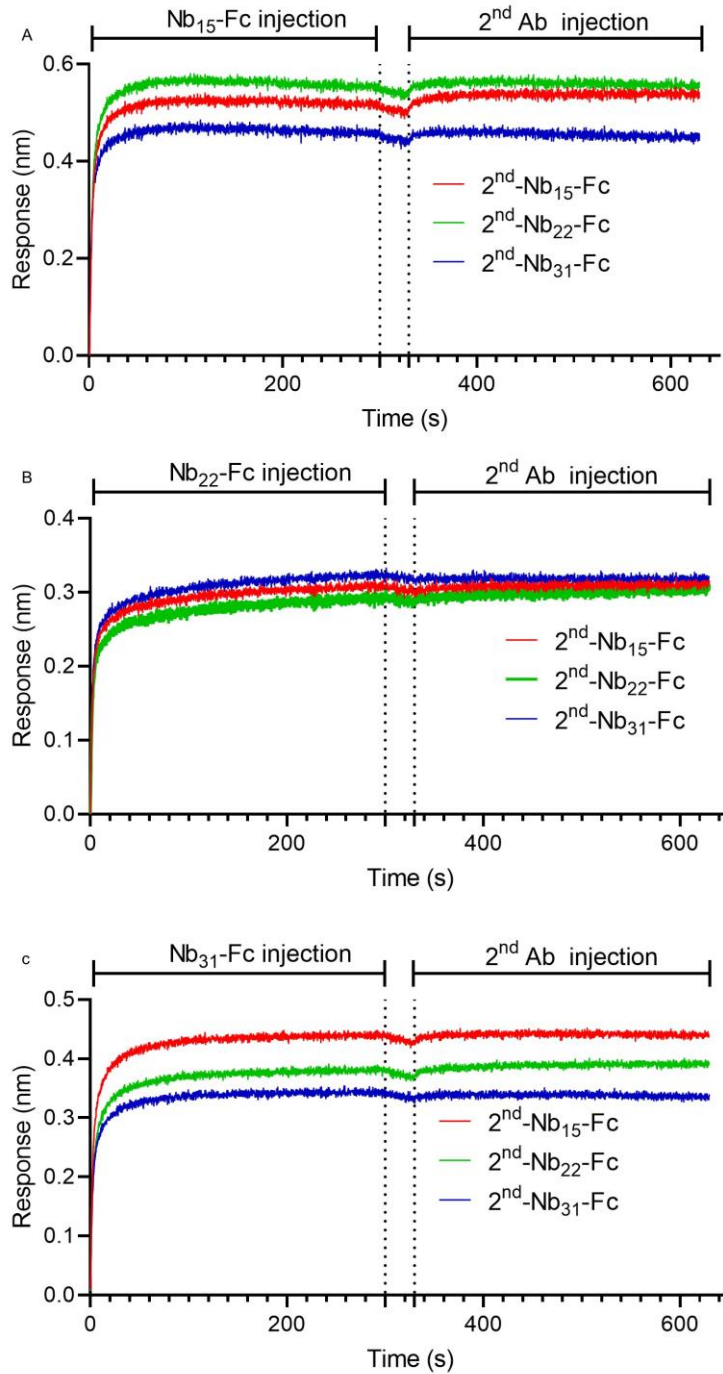

47

48 **Supplemental Figure 5. Epitope analysis of Nb-Fcs by BLI. Related to Figure 1.** RBD protein was

49 coated on the sensor, Nb<sub>15</sub>-Fc (A), Nb<sub>22</sub>-Fc (B) or Nb<sub>31</sub>-Fc(C) as the first antibody was added to bind

50 for 300 s following with the baseline step with 30 s immersion in 0.02% PBST. The second competing

51 concentration of Nb (50 µg/ml) was then added for 300 sec to measure binding in the presence of the

52 first saturating Nb.

53

54

55

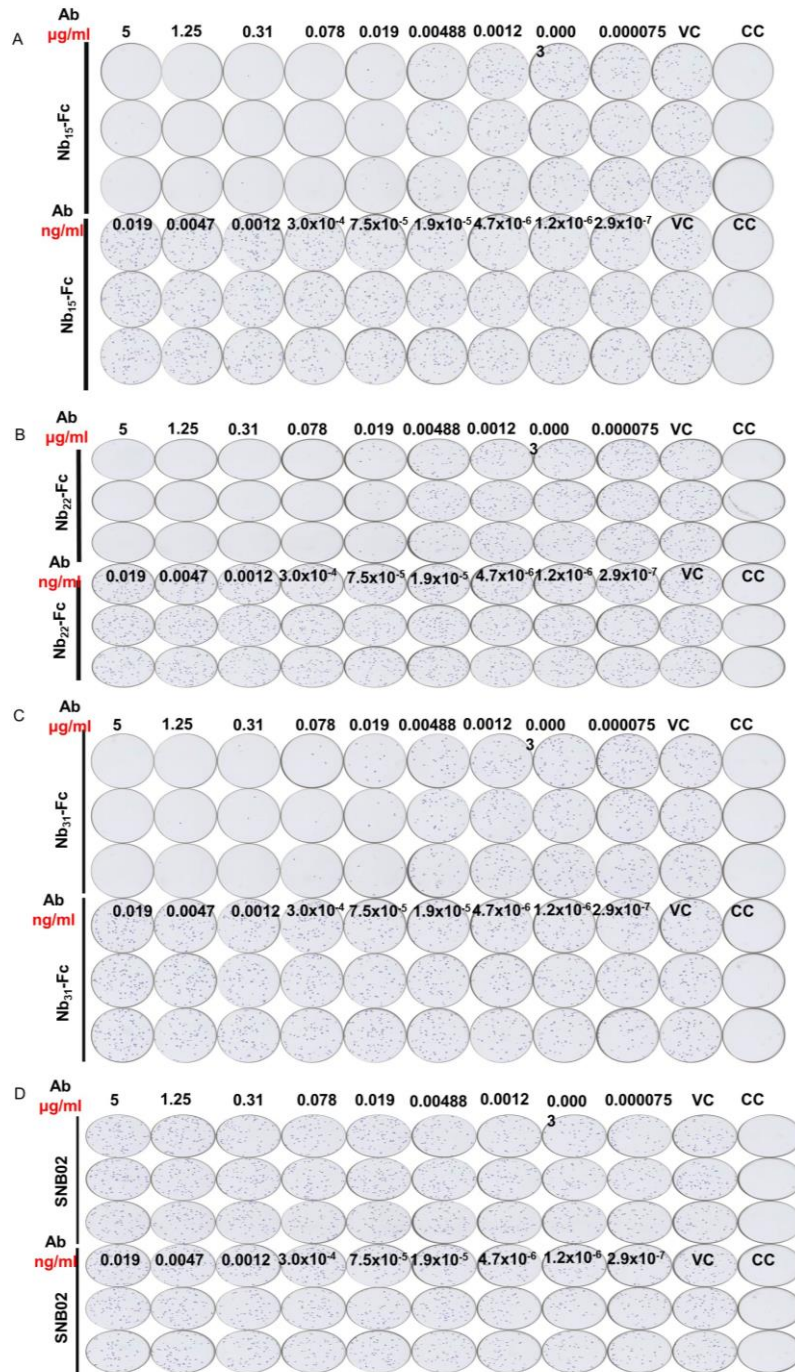

**E** Summary of C9Nbs inhibiting SARS-CoV-2 live virus

| $\mu\text{g/ml}$     | SARS-CoV-2 live virus |                  |                  |
|----------------------|-----------------------|------------------|------------------|
|                      | IC <sub>50</sub>      | IC <sub>80</sub> | IC <sub>90</sub> |
| Nb <sub>15</sub> -Fc | 0.0033                | 0.0084           | 0.0156           |
| Nb <sub>22</sub> -Fc | 0.0068                | 0.0108           | 0.0159           |
| Nb <sub>31</sub> -Fc | 0.0036                | 0.0100           | 0.0235           |

56

57 **Supplemental Figure S6. Characterizing the potency of neutralization against authentic**  
 58 **SARS-CoV-2 conferred by Nb-Fcs. Related to Figure 1.** The neutralization potency of Nb<sub>15</sub>-Fc  
 59 (A), Nb<sub>22</sub>-Fc (B), Nb<sub>31</sub>-Fc(C), SNB02 (isotype control antibody) (D) was detected based on  
 60 authentic SARS-CoV-2 plaque reduction neutralization test. The raw data was depicted. (E) A table  
 61 summary authentic SARS-CoV-2 neutralization potencies of Nb-Fcs.

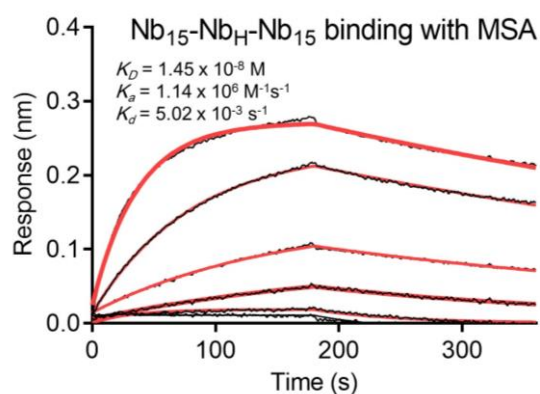

62

63 **Supplemental Figure 7. Kinetic binding curve of Nb<sub>15</sub>-Nb<sub>H</sub>-Nb<sub>15</sub> with MSA. Related to Figure 5.**

64 Kinetic binding curve of Nb<sub>15</sub>-Nb<sub>H</sub>-Nb<sub>15</sub> at the concentration of 300 nM, 100nM, 33.3 nM, 11.1nM,

65 3.7nM and 1.2 nM with MSA by BLI. Binding curves are colored black, and fit of the data to a 1:1

66 binding model is colored red.

67

68

69

70

71

72

73

74

75

76

77

78

79

80

81

82

83

84

85

86

87

88

89

90

91

92

93

94



**Supplemental Table 1. Summary of CDR sequences of positive Nb clones. Related to Figure 1.**

| ID                        | CDR1     | CDR2     | CDR3                   |
|---------------------------|----------|----------|------------------------|
| <b>Nb<sub>1</sub>-Fc</b>  | GNIFSIYT | VTSGGST  | N-----ARLFDPGY         |
| <b>Nb<sub>2</sub>-Fc</b>  | GGTLASFA | INIINRT  | AAHFVPPGSRLRDCLVNELYNY |
| <b>Nb<sub>4</sub>-Fc</b>  | GGTLASFA | INIINRT  | AAHFVPPGSRLRGCLVNELYNY |
| <b>Nb<sub>5</sub>-Fc</b>  | GFTWNYHA | ISSSGSTT | AAPHSGSVCPR--WAEYYGVDH |
| <b>Nb<sub>7</sub>-Fc</b>  | GGTLASFA | INIINRT  | AAHFVPPGSRLRGCLVNEAYNY |
| <b>Nb<sub>9</sub>-Fc</b>  | GGTLASFA | INIINRT  | AAHFVPPGGRLRGCLVNDLYNY |
| <b>Nb<sub>12</sub>-Fc</b> | GGTLASFA | INIINRT  | AAHFVPPGSRLRGCLVNDLYNY |
| <b>Nb<sub>13</sub>-Fc</b> | GGTLASFA | ITNSGST  | N-----TFHY             |
| <b>Nb<sub>14</sub>-Fc</b> | GGTLASFA | ISSSGGST | TARPSLWAVVAGCPLDQNTYFS |
| <b>Nb<sub>15</sub>-Fc</b> | GGTLASFA | ISSSGST  | AG-VVHDVQAM--CVMNP-WGS |
| <b>Nb<sub>19</sub>-Fc</b> | GGTLASFA | INIINRT  | AAHFVPPGSRLRGCLVNDVYNY |
| <b>Nb<sub>22</sub>-Fc</b> | GGTLASFA | IDVINRA  | AAHFVPPGSRLRGCLVNELYNY |
| <b>Nb<sub>24</sub>-Fc</b> | GGTLASFA | INIINRT  | AAHFVPPESRLRGCLVNELYNY |
| <b>Nb<sub>25</sub>-Fc</b> | GGTLASFA | ITSRRDT  | YG-----QDVLGQIY        |
| <b>Nb<sub>27</sub>-Fc</b> | GGTLASFA | ITSGGST  | TT-----AGSWQGDY        |
| <b>Nb<sub>28</sub>-Fc</b> | GGTLASFA | INIINRT  | AAHFVPPESRLRGCLVNEAYNY |
| <b>Nb<sub>29</sub>-Fc</b> | GGTLASFA | ISSRSFT  | YG-----QDILGQIY        |
| <b>Nb<sub>30</sub>-Fc</b> | GGTLASFA | INIINRT  | AAHFVPPGSRLRGCLVNELYNY |
| <b>Nb<sub>31</sub>-Fc</b> | GGTLASFA | INIINRP  | AAHFVPPGSRLGGCLVNELYNY |
| <b>Nb<sub>33</sub>-Fc</b> | GGTLASFA | INIINRT  | AAHFVPPGSRFRGCSVNELYNY |
| <b>Nb<sub>34</sub>-Fc</b> | GGTLASFA | INIINRP  | AAHFVPPGSRLGGCLVNELYNY |
| <b>Nb<sub>H</sub></b>     | GFILDYYA | IDSSGGTT | AAGGDLGVGQCSTWVRAYDY   |

96

97

98

99

100

101

102

103

104

105

106

107

108

109

110

111

112  
113  
114

**Supplemental Table 2. Summary of Nbs inhibiting SARS-CoV-2 variants. Related to Figure 1.**

| Variants | Nb <sub>15</sub> -Fc ( mean±sd µg/ml ) |                  |                  | Nb <sub>22</sub> -Fc ( mean±sd µg/ml ) |                  |                  | Nb <sub>31</sub> -Fc ( mean±sd µg/ml ) |                  |                  | Nb <sub>15</sub> -Nb <sub>H</sub> -Nb <sub>15</sub> ( mean±sd µg/ml ) |                  |                  |
|----------|----------------------------------------|------------------|------------------|----------------------------------------|------------------|------------------|----------------------------------------|------------------|------------------|-----------------------------------------------------------------------|------------------|------------------|
|          | IC <sub>50</sub>                       | IC <sub>80</sub> | IC <sub>90</sub> | IC <sub>50</sub>                       | IC <sub>80</sub> | IC <sub>90</sub> | IC <sub>50</sub>                       | IC <sub>80</sub> | IC <sub>90</sub> | IC <sub>50</sub>                                                      | IC <sub>80</sub> | IC <sub>90</sub> |
| WT       | 0.0008±0.0001                          | 0.0019±0.0004    | 0.0033±0.0012    | 0.0016±0.0001                          | 0.0046±0.0012    | 0.0086±0.0033    | 0.0023±0.0004                          | 0.0083±0.0019    | 0.0183±0.0059    | 0.0004±0                                                              | 0.0012±0.0004    | 0.0018±0.0009    |
| Q321L    | 0.0009±0.0004                          | 0.0023±0.0007    | 0.0039±0.0008    | 0.0014±0.0003                          | 0.0042±0.0009    | 0.0079±0.0019    | 0.002±0.0005                           | 0.0065±0.0017    | 0.0133±0.0033    | 0.001±0.0001                                                          | 0.0022±0.0004    | 0.0034±0.0009    |
| V341I    | 0.0007±0.0002                          | 0.0026±0.0005    | 0.0059±0.0019    | 0.0017±0.0005                          | 0.0042±0.0007    | 0.007±0.001      | 0.0028±0.0004                          | 0.0087±0.0024    | 0.0169±0.0058    | 0.0011±0.0001                                                         | 0.0027±0.0009    | 0.0047±0.0022    |
| A348T    | 0.001±0.0002                           | 0.0023±0.0003    | 0.0036±0.0005    | 0.0019±0.0008                          | 0.0046±0.0012    | 0.0076±0.0016    | 0.0029±0.0001                          | 0.0088±0.0013    | 0.0176±0.0032    | 0.0008±0.0002                                                         | 0.0014±0.0001    | 0.0019±0.0004    |
| N354D    | 0.0008±0.0002                          | 0.0022±0.0002    | 0.0041±0.001     | 0.0013±0.0003                          | 0.0033±0.0005    | 0.0056±0.0012    | 0.0019±0.0001                          | 0.0068±0.0018    | 0.0145±0.0051    | 0.0006±0.0002                                                         | 0.0016±0.0006    | 0.0032±0.0013    |
| S359N    | 0.0011±0.0001                          | 0.0026±0.0003    | 0.0043±0.0006    | 0.0016±0.0003                          | 0.0037±0.0005    | 0.0061±0.0008    | 0.002±0.0005                           | 0.0064±0.0012    | 0.0129±0.0037    | 0.0008±0.0002                                                         | 0.0017±0.0002    | 0.0025±0.0005    |
| V367F    | 0.0007±0.0001                          | 0.002±0.0002     | 0.0036±0.0004    | 0.0011±0.0003                          | 0.0033±0.0003    | 0.0062±0.0004    | 0.0021±0.0006                          | 0.0095±0.0017    | 0.0237±0.0022    | 0.0005±0                                                              | 0.0013±0.0001    | 0.0026±0.0006    |
| K378R    | 0.0007±0.0002                          | 0.0024±0.0003    | 0.0046±0.0001    | 0.0012±0.0002                          | 0.0028±0.0003    | 0.0045±0.0005    | 0.0013±0.0001                          | 0.004±0.0004     | 0.0079±0.0017    | 0.0008±0.0002                                                         | 0.002±0.0004     | 0.0033±0.0006    |
| R408I    | 0.0007±0.0002                          | 0.002±0.0007     | 0.0035±0.0016    | 0.001±0.0001                           | 0.0027±0.0003    | 0.0047±0.0009    | 0.0014±0.0002                          | 0.0038±0.001     | 0.0069±0.0026    | 0.0007±0.0001                                                         | 0.0014±0.0002    | 0.002±0.0005     |
| Q409E    | 0.0005±0.0001                          | 0.0014±0         | 0.0026±0.0002    | 0.0009±0.0003                          | 0.0022±0.0007    | 0.0036±0.0011    | 0.0009±0.0001                          | 0.0029±0.0004    | 0.0057±0.0007    | 0.0007±0.0002                                                         | 0.0014±0.0002    | 0.0021±0.0003    |
| K458R    | 0.0009±0.0003                          | 0.0025±0.0002    | 0.0047±0.0006    | 0.0013±0.0001                          | 0.0041±0.0014    | 0.008±0.0036     | 0.0025±0.0003                          | 0.0068±0.0013    | 0.0128±0.004     | 0.0008±0.0002                                                         | 0.0018±0.0003    | 0.0029±0.0004    |
| G476S    | 0.0006±0.0002                          | 0.0015±0.0004    | 0.0025±0.0006    | 0.0013±0.0006                          | 0.0034±0.0011    | 0.006±0.0013     | 0.0015±0.0001                          | 0.0049±0.0008    | 0.0101±0.0023    | 0.0003±0.0001                                                         | 0.0009±0.0002    | 0.0014±0.0003    |
| V483A    | 0.0006±0.0001                          | 0.0017±0.0005    | 0.0031±0.0011    | 0.0015±0.0003                          | 0.0039±0.0008    | 0.0069±0.0026    | 0.0027±0.001                           | 0.0093±0.0018    | 0.0206±0.0027    | 0.0005±0.0001                                                         | 0.0013±0         | 0.0022±0.0002    |
| Y508H    | 0.0005±0.0001                          | 0.0023±0.0003    | 0.0053±0.001     | 0.0013±0.0002                          | 0.0035±0.0007    | 0.006±0.0015     | 0.0018±0.0005                          | 0.0068±0.0007    | 0.0157±0.0047    | 0.0008±0.0001                                                         | 0.0019±0.0006    | 0.0033±0.0016    |
| H519P    | 0.0008±0.0001                          | 0.0023±0.0002    | 0.0041±0.0005    | 0.0011±0.0002                          | 0.0033±0         | 0.006±0.0004     | 0.0014±0.0003                          | 0.005±0.0004     | 0.0107±0.0032    | 0.0007±0.0002                                                         | 0.0016±0.0001    | 0.0025±0.0002    |
| D614G    | 0.0007±0.0001                          | 0.002±0.0002     | 0.0035±0.0007    | 0.0012±0.0005                          | 0.0033±0.0005    | 0.0059±0.0003    | 0.0015±0.0004                          | 0.0039±0.001     | 0.0067±0.0016    | 0.0006±0.0001                                                         | 0.0015±0.0005    | 0.0026±0.001     |
| A435S    | N/A                                    | N/A              | N/A              | N/A                                    | N/A              | N/A              | N/A                                    | N/A              | N/A              | 0.0007±0.0001                                                         | 0.0015±0.0003    | 0.0024±0.0006    |
| I472V    | N/A                                    | N/A              | N/A              | N/A                                    | N/A              | N/A              | N/A                                    | N/A              | N/A              | 0.0006±0.0001                                                         | 0.0014±0.0003    | 0.0023±0.0006    |
| E484K    | N/A                                    | N/A              | N/A              | N/A                                    | N/A              | N/A              | N/A                                    | N/A              | N/A              | >1.000                                                                | >1.000           | >1.000           |
| N501Y    | N/A                                    | N/A              | N/A              | N/A                                    | N/A              | N/A              | N/A                                    | N/A              | N/A              | 0.0007±0.0002                                                         | 0.002±0.0005     | 0.0042±0.0013    |

Note: N/A, no test

115  
116  
117  
118  
119  
120  
121

122  
123  
124

**Supplemental Table 3.** Summary of RBD binding with Nb<sub>15S</sub> in different conditions. **Related to Figure 5.**

| Sample ID                                           | Condition | Conc. (nM) | Response | KD (M)   | Ka(1/Ms) | Kd(1/s)  | RMax   | Full R <sup>2</sup> |
|-----------------------------------------------------|-----------|------------|----------|----------|----------|----------|--------|---------------------|
| Nb <sub>15</sub> -Nb <sub>H</sub> -Nb <sub>15</sub> | WT        | 133.3      | 0.3806   | <1.0E-12 | 3.44E+05 | <1.0E-07 | 0.3687 | 0.9676              |
|                                                     | Aero      | 133.3      | 0.2139   | 9.92E-09 | 4.11E+04 | 4.08E-04 | 0.3277 | 0.9957              |
|                                                     | 37 °C     | 133.3      | 0.3756   | <1.0E-12 | 1.89E+05 | <1.0E-07 | 0.374  | 0.9948              |
|                                                     | 50 °C     | 133.3      | 0.3903   | 5.78E-11 | 2.11E+05 | 1.22E-05 | 0.3849 | 0.996               |
|                                                     | 60 °C     | 133.3      | 0.4048   | 5.57E-10 | 1.91E+05 | 1.06E-04 | 0.402  | 0.9986              |
|                                                     | 70 °C     | 133.3      | 0.3775   | 2.52E-10 | 1.63E+05 | 4.10E-05 | 0.3801 | 0.9989              |
|                                                     | 80 °C     | 133.3      | 0.3199   | 5.64E-09 | 5.85E+04 | 3.30E-04 | 0.4193 | 0.9994              |
|                                                     | 90 °C     | 133.3      | 0.1078   | 1.02E-08 | 2.90E+04 | 2.95E-04 | 0.211  | 0.9978              |
| Nb <sub>15</sub> -Fc                                | WT        | 62.5       | 0.8028   | <1.0E-12 | 6.98E+05 | <1.0E-07 | 0.7814 | 0.9824              |
|                                                     | Aero      | 62.5       | 0.3398   | 2.79E-10 | 5.05E+04 | 1.41E-05 | 0.7387 | 0.999               |
|                                                     | 37 °C     | 62.5       | 0.8136   | <1.0E-12 | 4.34E+05 | <1.0E-07 | 0.804  | 0.9946              |
|                                                     | 50 °C     | 62.5       | 0.853    | <1.0E-12 | 4.11E+05 | <1.0E-07 | 0.848  | 0.9976              |
|                                                     | 60 °C     | 62.5       | 0.7989   | 4.38E-11 | 4.11E+05 | 1.80E-05 | 0.7944 | 0.9979              |
|                                                     | 70 °C     | 62.5       | 0.6126   | 4.95E-09 | 8.87E+04 | 4.39E-04 | 0.956  | 0.9995              |
|                                                     | 80 °C     | 62.5       | 0.2077   | 1.98E-08 | 4.16E+04 | 8.26E-04 | 0.557  | 0.9983              |
|                                                     | 90 °C     | 62.5       | 0.1088   | 4.12E-08 | 2.76E+04 | 1.14E-03 | 0.4281 | 0.9978              |
| 3xNb <sub>15</sub>                                  | WT        | 133.3      | 0.3769   | <1.0E-12 | 6.20E+05 | <1.0E-07 | 0.3637 | 0.8833              |
|                                                     | Aero      | 133.3      | 0.184    | <1.0E-12 | 2.55E+04 | <1.0E-07 | 0.3816 | 0.9946              |
|                                                     | 37 °C     | 133.3      | 0.3667   | <1.0E-12 | 4.01E+05 | <1.0E-07 | 0.3578 | 0.9563              |
|                                                     | 50 °C     | 133.3      | 0.3588   | <1.0E-12 | 3.96E+05 | <1.0E-07 | 0.3507 | 0.9583              |
|                                                     | 60 °C     | 133.3      | 0.3715   | <1.0E-12 | 3.49E+05 | <1.0E-07 | 0.3635 | 0.9717              |
|                                                     | 70 °C     | 133.3      | 0.2294   | <1.0E-12 | 2.78E+04 | <1.0E-07 | 0.4508 | 0.9975              |
|                                                     | 80 °C     | 133.3      | 0.2748   | 4.97E-10 | 4.53E+04 | 2.25E-05 | 0.4052 | 0.9994              |
|                                                     | 90 °C     | 133.3      | 0.1294   | 4.87E-09 | 5.21E+04 | 2.54E-04 | 0.1778 | 0.9968              |

125  
126  
127  
128  
129
